# Supplementary material
Source: PubMed Central journal article supplement (PMC6727472)
Supplement: Supp_Data.pdf [file Supp_Data.pdf]

## Supplementary Data

### Supplementary Materials

#### *The anticipation-conflict-reward task*

- (1) Reward trial starts with a presentation of a Reward Cue followed by a Flanker and Reward Outcome that could be a \$1 win (e.g., expected reward), \$0 no-win (unexpected nonreward).
- (2) Nonreward trial starts with a presentation of a Nonreward Cue followed by a Flanker and Reward Outcome of \$0 no-win. Slow and/or incorrect responses elicit a loss of -\$1.

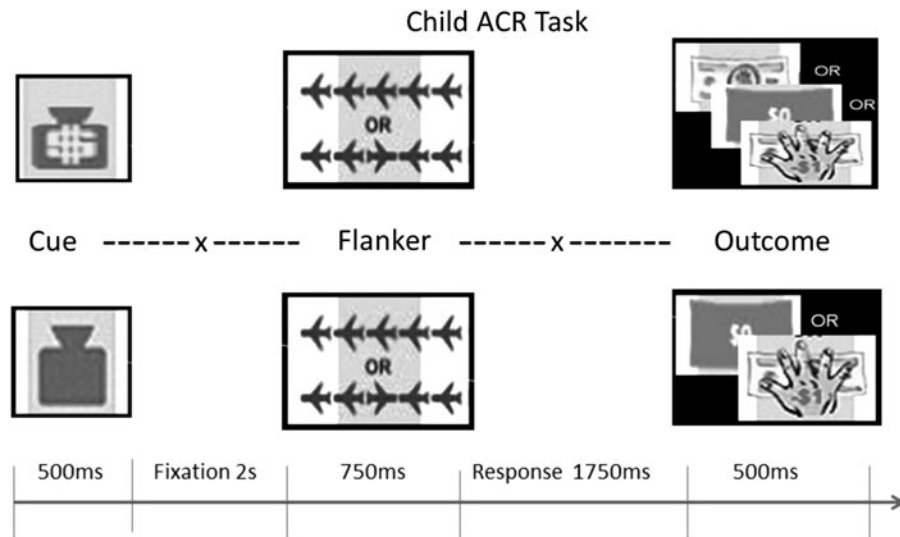

**SUPPLEMENTARY FIG. S1.** The time duration of the anticipation-conflict-reward (ACR) components.
